# Supplementary material for: Multi-stimuli-responsive nanomicelles fabricated using synthetic polymer polylysine conjugates for tumor microenvironment dependent drug delivery
Source: Royal Society of Chemistry journal article supplement (doi:10.1039/d0tb00721h), 2020-01-01
Supplement: d0tb00721h1.pdf [file d0tb00721h1.pdf]

## Electronic Supplementary Information

# Multi-stimuli-responsive nanomicelles fabricated using synthetic polymer polylysine conjugates for tumor microenvironment dependent drug delivery

Rimesh Augustine,<sup>a</sup> Dae-Kyoung Kim,<sup>b</sup> Nagendra Kalva,<sup>a</sup> Kuen Hee Eom,<sup>a</sup> Jae Ho Kim,<sup>\*b</sup> Il Kim<sup>\*,a</sup>

<sup>a</sup> BK21 PLUS Center for Advanced Chemical Technology, Dept. of Chemical engineering & Polymer Science and Engineering, Pusan National University, Busan 46241, Republic of Korea.

<sup>b</sup> Department of Physiology, School of Medicine, Pusan National University, Yangsan 626-870, Gyeongsangnam-do, Republic of Korea.

### Contents

|                                                                                                                                                                                                                                                                                                                                                                                                                                                                                                      |    |
|------------------------------------------------------------------------------------------------------------------------------------------------------------------------------------------------------------------------------------------------------------------------------------------------------------------------------------------------------------------------------------------------------------------------------------------------------------------------------------------------------|----|
| <b>Fig. S1.</b> (a) <sup>1</sup> H and (b) <sup>13</sup> C NMR spectra of the RAFT CTA-2.....                                                                                                                                                                                                                                                                                                                                                                                                        | S1 |
| <b>Fig. S2.</b> <sup>1</sup> H NMR spectra of the (a) p(NIPAM)-NH <sub>2</sub> , (b) p(NIPAM) <sub>30</sub> -SS- <i>b</i> -p(Lys) <sub>30</sub> and (c) p(NIPAM) <sub>30</sub> -SS- <i>b</i> -p(Lys) <sub>30</sub> - <i>b</i> -p(CL) <sub>125</sub> .....                                                                                                                                                                                                                                            | S1 |
| <b>Fig. S3.</b> FTIR profiles of (a) alkyne terminated polycaprolactone and (b) p(NIPAM) <sub>30</sub> -SS- <i>b</i> -p(Lys) <sub>30</sub> - <i>b</i> -p(CL) <sub>125</sub> .....                                                                                                                                                                                                                                                                                                                    | S2 |
| <b>Fig. S4.</b> (a) <sup>1</sup> H and (b) <sup>13</sup> C NMR spectra of the alkyne terminated polycaprolactone.....                                                                                                                                                                                                                                                                                                                                                                                | S2 |
| <b>Fig. S5.</b> <sup>1</sup> H NMR spectra of (a) protected and (b) deprotected p(NIPAM) <sub>30</sub> -SS- <i>b</i> -p(Lys) <sub>30</sub> - <i>b</i> -p(CL) <sub>125</sub> .....                                                                                                                                                                                                                                                                                                                    | S3 |
| <b>Fig. S6.</b> (i) GPC curves of p(NIPAM) <sub>30</sub> - <i>b</i> -p(Lys) <sub>30</sub> - <i>b</i> -p(CL) <sub>n</sub> .....                                                                                                                                                                                                                                                                                                                                                                       | S3 |
| <b>Fig. S7.</b> Transmittance verses temperature curves for aqueous solution of (a) p(NIPAM) <sub>30</sub> -SS- <i>b</i> -p(Lys) <sub>30</sub> - <i>b</i> -p(CL) <sub>50</sub> , (b) p(NIPAM) <sub>30</sub> -SS- <i>b</i> -p(Lys) <sub>30</sub> - <i>b</i> -p(CL) <sub>75</sub> , (c) p(NIPAM) <sub>30</sub> -SS- <i>b</i> -p(Lys) <sub>30</sub> - <i>b</i> -p(CL) <sub>100</sub> and (d) p(NIPAM) <sub>30</sub> -SS- <i>b</i> -p(Lys) <sub>30</sub> - <i>b</i> -p(CL) <sub>125</sub> at pH 7.4..... | S4 |
| <b>Fig. S8.</b> Flow cytometric analysis of A2780 ovarian cancer cells after incubation with Dox-loaded p(NIPAM) <sub>30</sub> -SS- <i>b</i> -p(Lys) <sub>30</sub> - <i>b</i> -p(CL) <sub>125</sub> micelles under different pH and temperature conditions for 3 h.....                                                                                                                                                                                                                              | S5 |
| <b>Table S1.</b> Comparison of tumor accumulation of p(NIPAM) <sub>30</sub> -SS- <i>b</i> -p(Lys) <sub>30</sub> - <i>b</i> -p(CL) <sub>125</sub> with various polymeric nanocarriers exhibiting high fluorescence intensity from liver.....                                                                                                                                                                                                                                                          | S5 |

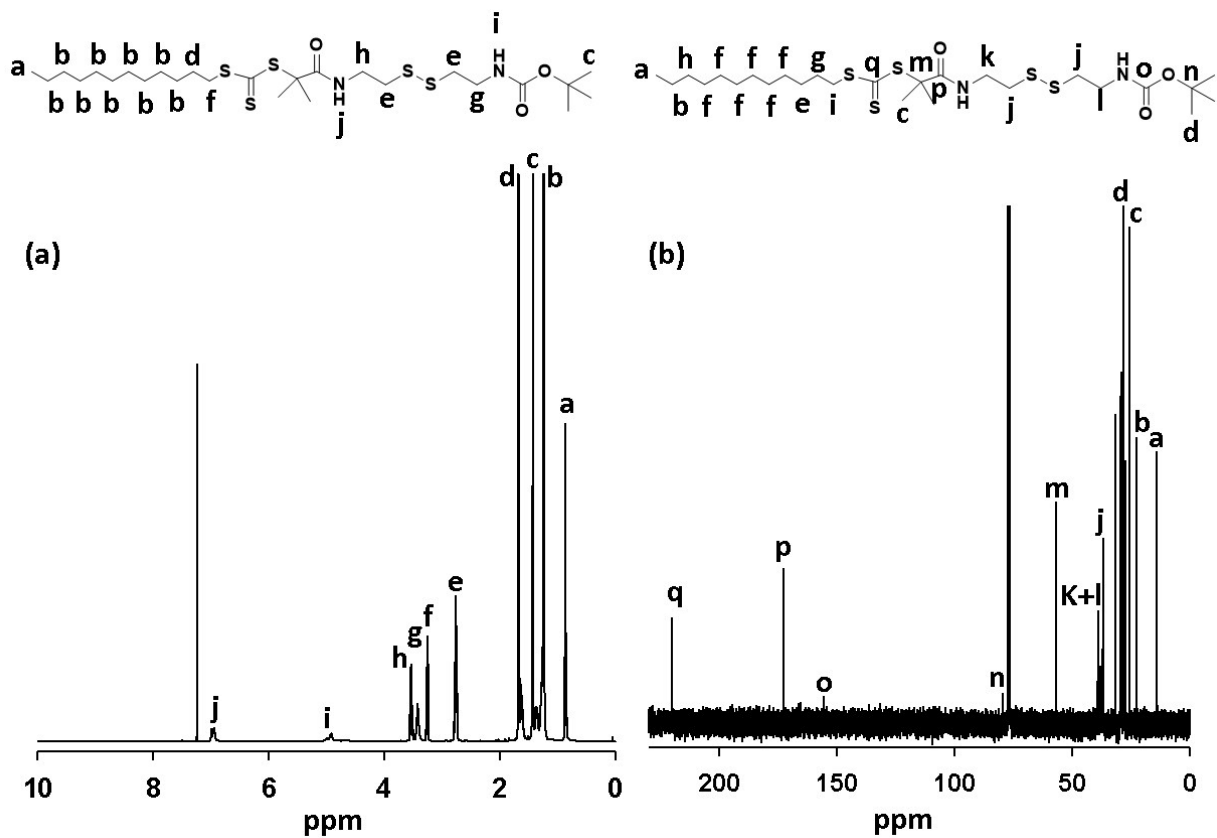

Fig. S1. (a)  $^1\text{H}$  and (b)  $^{13}\text{C}$  NMR spectra of the RAFT CTA-2.

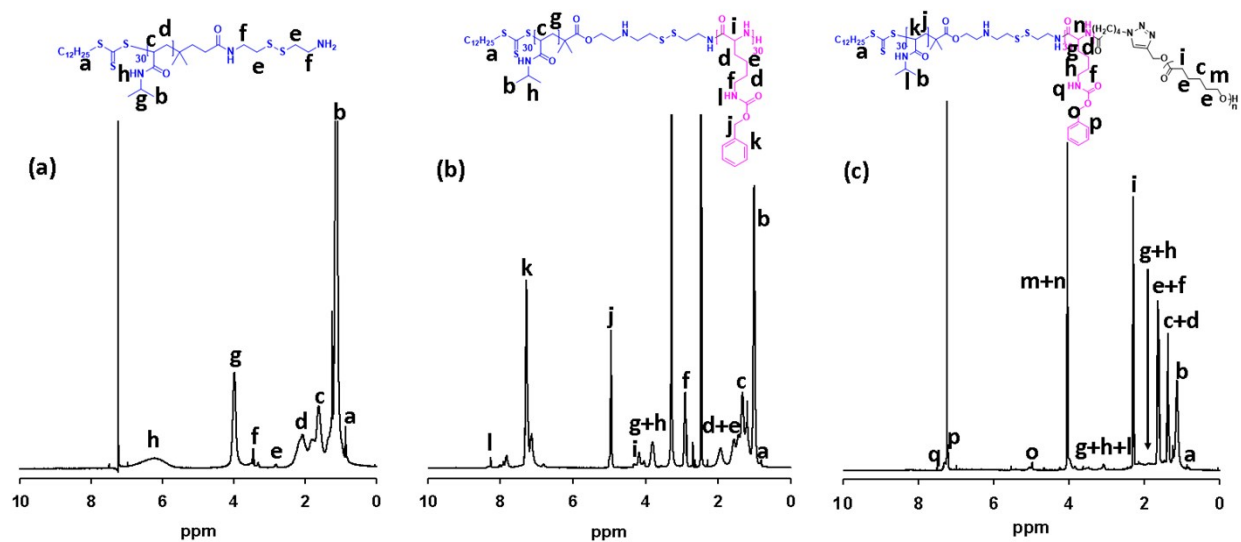

Fig. S2.  $^1\text{H}$  NMR spectra of the (a)  $\text{p(NIPAM)-NH}_2$ , (b)  $\text{p(NIPAM)}_{30}\text{-SS-}b\text{-p(Lys)}_{30}$  and (c)  $\text{p(NIPAM)}_{30}\text{-SS-}b\text{-p(Lys)}_{30}\text{-}b\text{-p(CL)}_{125}$ .

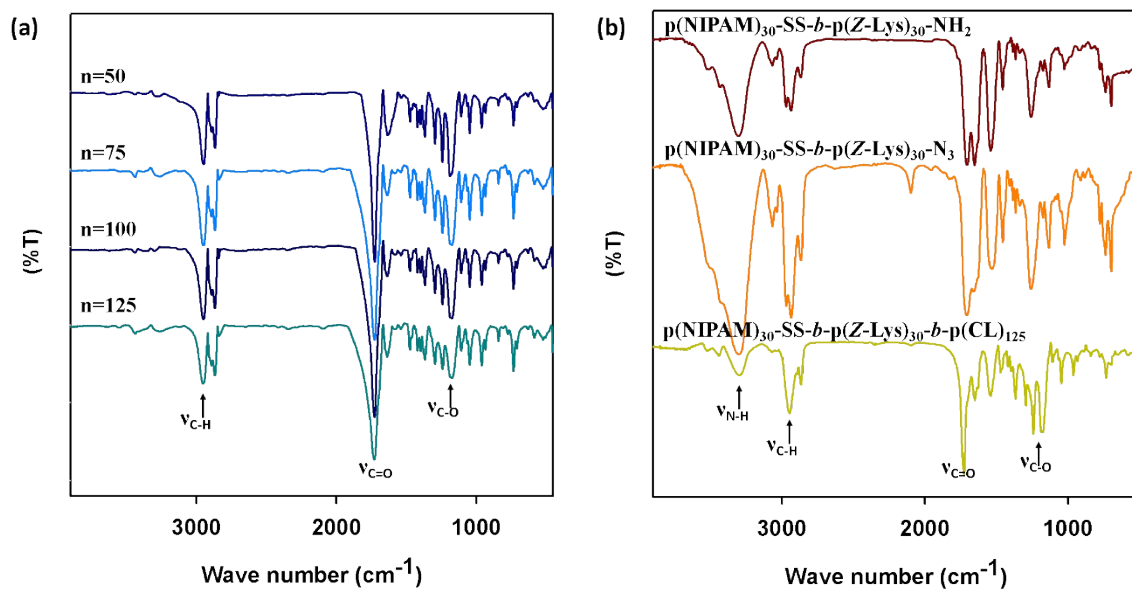

Fig. S3. FTIR profiles of (a) alkyne terminated polycaprolactone and (b)  $\text{p(NIPAM)}_{30}\text{-SS-}b\text{-p(Lys)}_{30}\text{-}b\text{-p(CL)}_{125}$ .

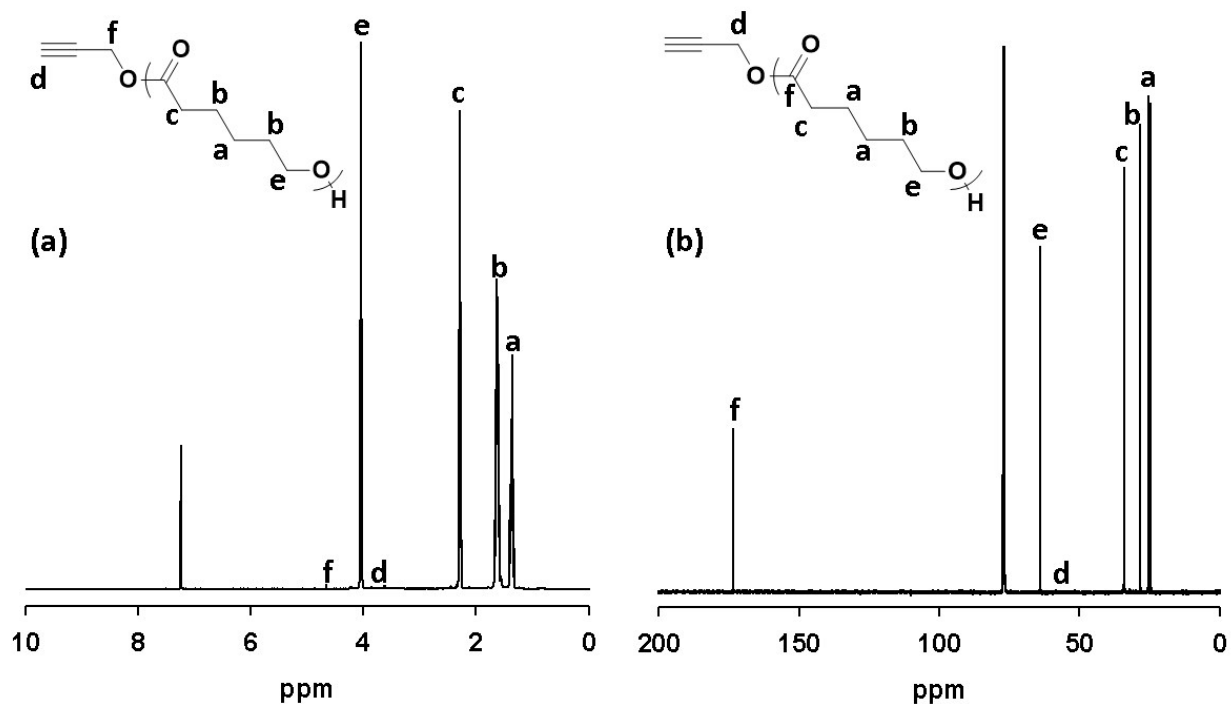

Fig. S4. (a)  $^1\text{H}$  and (b)  $^{13}\text{C}$  NMR spectra of the alkyne terminated polycaprolactone.

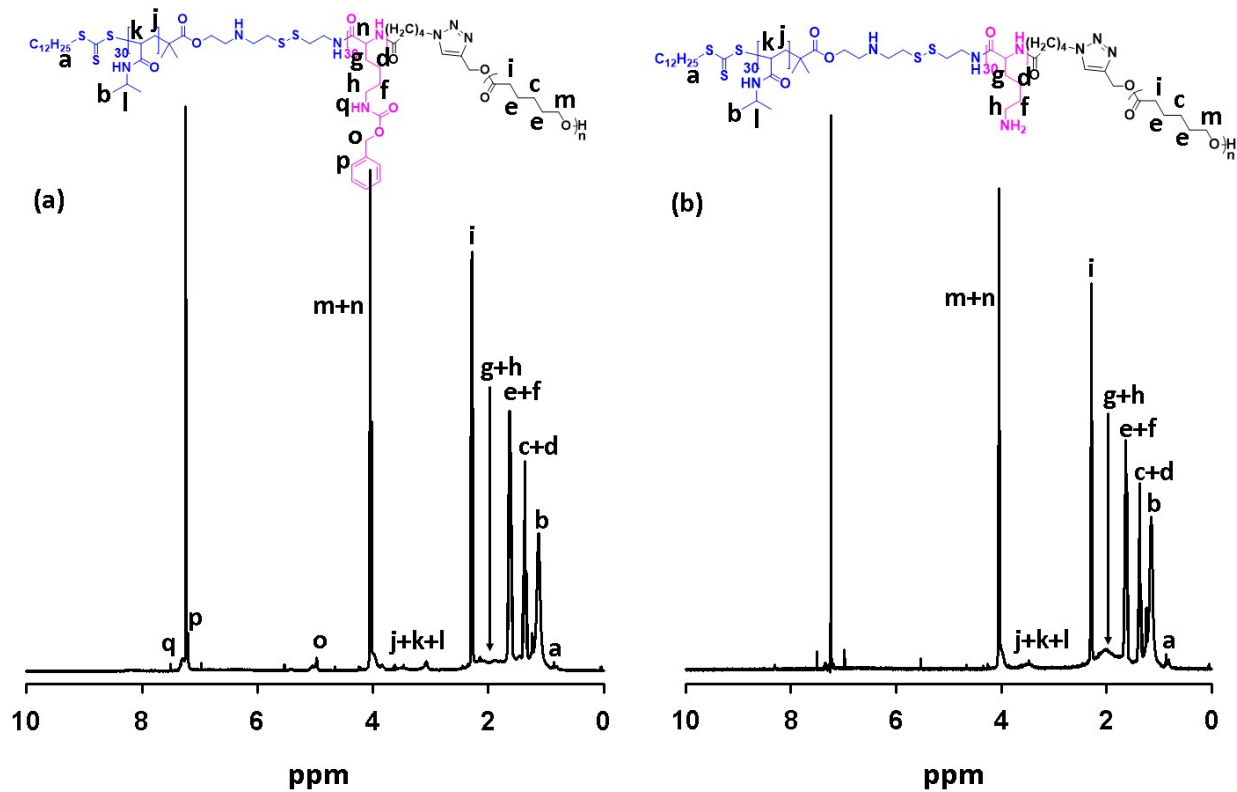

Fig. S5.  $^1\text{H}$  NMR spectra of (a) protected and (b) deprotected  $\text{p(NIPAM)}_{30}\text{-SS-}b\text{-p(Lys)}_{30}\text{-}b\text{-p(CL)}_{125}$ .

- (a)  $\text{p(NIPAM)}_{30}\text{-SS-}b\text{-p(Lys)}_{30}\text{-}b\text{-p(CL)}_{50}$
- (b)  $\text{p(NIPAM)}_{30}\text{-SS-}b\text{-p(Lys)}_{30}\text{-}b\text{-p(CL)}_{75}$
- (c)  $\text{p(NIPAM)}_{30}\text{-SS-}b\text{-p(Lys)}_{30}\text{-}b\text{-p(CL)}_{100}$
- (d)  $\text{p(NIPAM)}_{30}\text{-SS-}b\text{-p(Lys)}_{30}\text{-}b\text{-p(CL)}_{125}$

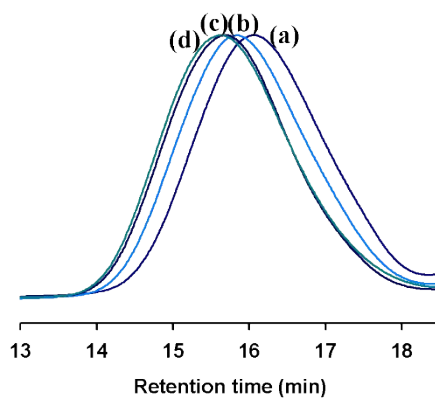

Fig. S6. (i) GPC curves of  $\text{p(NIPAM)}_{30}\text{-}b\text{-p(Lys)}_{30}\text{-}b\text{-p(CL)}_n$ .

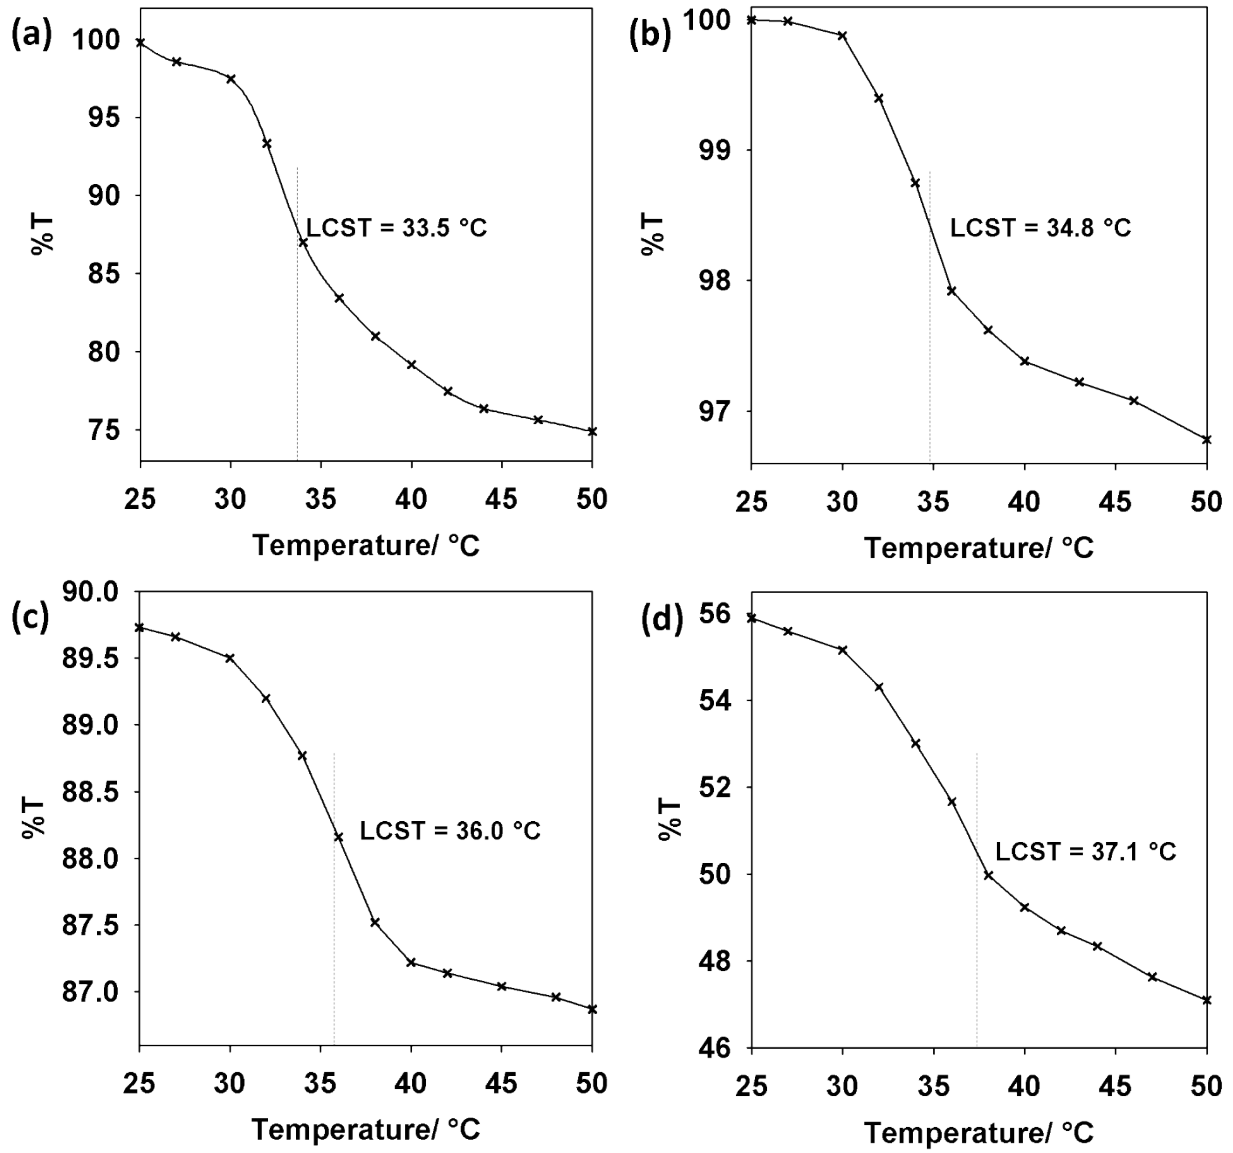

Fig. S7. Transmittance versus temperature curves for aqueous solution of (a)  $p(\text{NIPAM})_{30}\text{-SS-}b\text{-}p(\text{Lys})_{30}\text{-}b\text{-}p(\text{CL})_{50}$ , (b)  $p(\text{NIPAM})_{30}\text{-SS-}b\text{-}p(\text{Lys})_{30}\text{-}b\text{-}p(\text{CL})_{75}$ , (c)  $p(\text{NIPAM})_{30}\text{-SS-}b\text{-}p(\text{Lys})_{30}\text{-}b\text{-}p(\text{CL})_{100}$  and (d)  $p(\text{NIPAM})_{30}\text{-SS-}b\text{-}p(\text{Lys})_{30}\text{-}b\text{-}p(\text{CL})_{125}$  at pH 7.4.

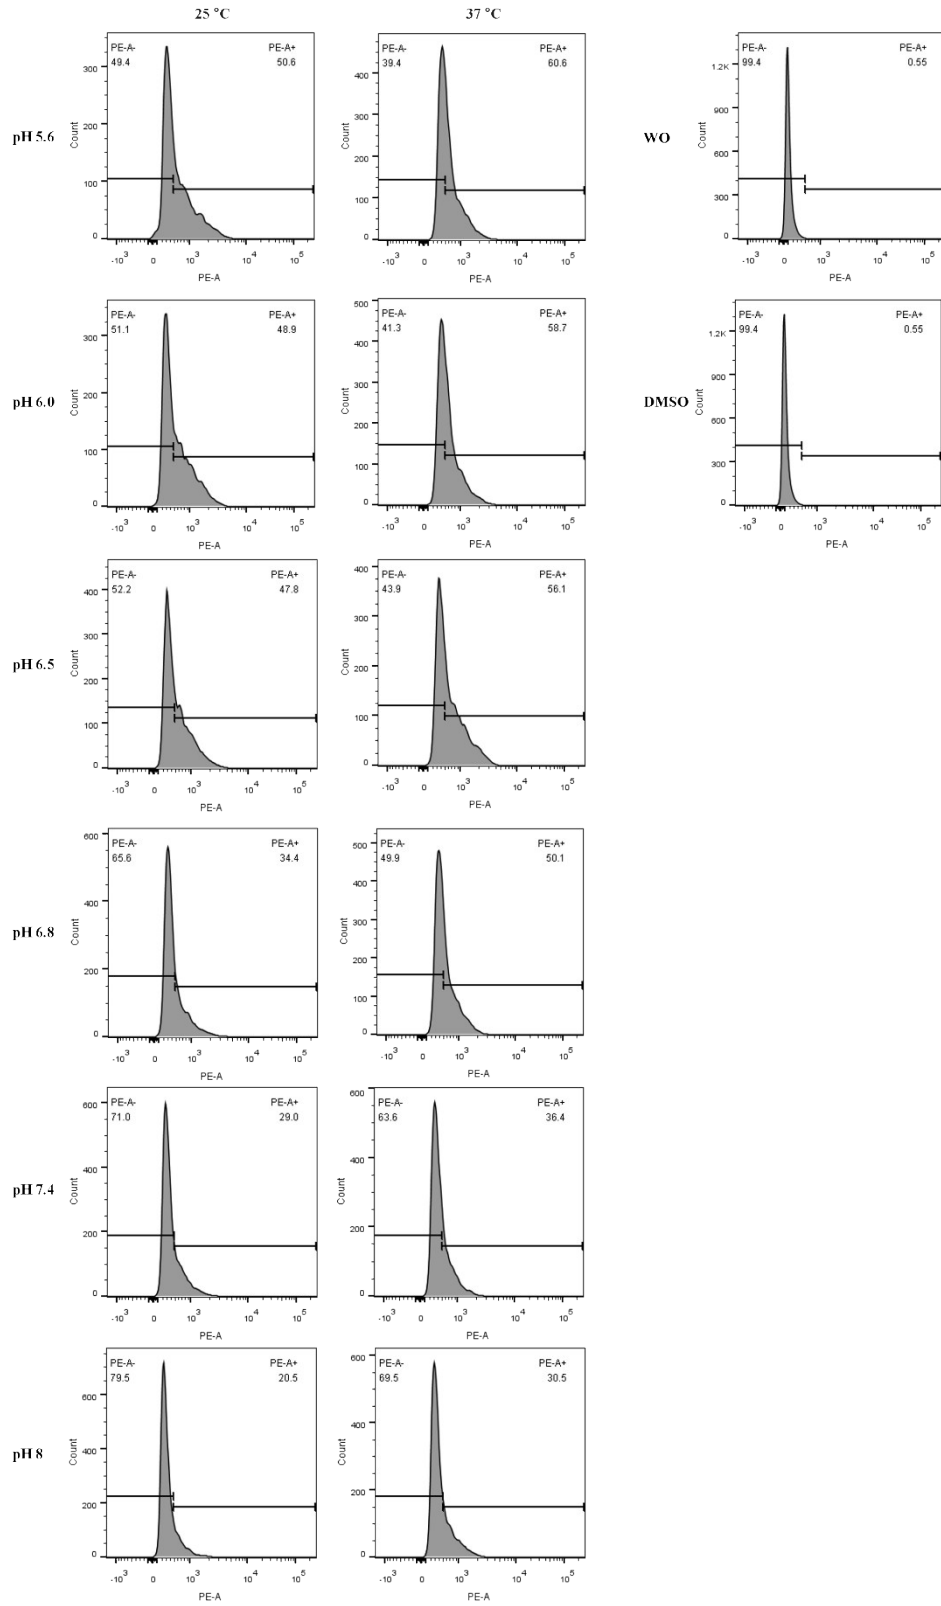

**Fig. S8.** Flow cytometric analysis of A2780 ovarian cancer cells after incubation with Dox-loaded p(NIPAM)<sub>30</sub>-SS-b-p(Lys)<sub>30</sub>-b-p(CL)<sub>125</sub> micelles under different pH and temperature conditions for 3 h.

**Table S1.** Comparison of tumor accumulation of p(NIPAM)<sub>30</sub>-SS-b-p(Lys)<sub>30</sub>-b-p(CL)<sub>125</sub> with various polymeric nanocarriers exhibiting high fluorescence intensity from non-tumor organs.

| Entry | Nanocarrier                                                            | Targeting group | Preferred site of accumulation | Ref. <sup>a</sup> |
|-------|------------------------------------------------------------------------|-----------------|--------------------------------|-------------------|
| 1     | CMP-Pp IX                                                              | CMP             | liver                          | S1                |
| 2     | PS-g-OEMPEG-DOX                                                        | No              | liver                          | S2                |
| 3     | T-S-NLC                                                                | TISWPPR         | liver                          | S3                |
| 4     | AI Egen-lipid conjugate                                                | Lipid           | liver                          | S4                |
| 5     | MGC-GNP/PTX                                                            | MGC peptide     | liver                          | S5                |
| 6     | PDFDP                                                                  | Anti-HER2       | liver                          | S6                |
| 7     | RGD-modified-lipid-calcium carbonate                                   | RGD             | liver/kidney                   | S7                |
| 8     | Tf-QLPVM                                                               | Tf              | liver/spleen                   | S8                |
| 9     | DIR/His-SA-BSP                                                         | SA-BSP          | liver                          | S9                |
| 10    | cRGD-PTN-DOX                                                           | RGD             | liver/kidney                   | S10               |
| 11    | FA-PLGA-Pba                                                            | FA              | liver/kidney                   | S11               |
| 12    | Natura egg yolk lipid nanovector                                       | FA              | Liver/spleen                   | S12               |
| 13    | p(NIPAM) <sub>30</sub> -b-p(Lys) <sub>30</sub> -b-p(CL) <sub>125</sub> | No              | tumor                          | this work         |

CMP-Pp IX : C<sub>16</sub>-K(protoporphyrin IX)-GRRRR-AEEA-K(FAM)SDEVDSK(DabcyI)-PEG<sub>8</sub>-PEG<sub>8</sub>; PS-g-OEMPEG-DOX : ortho ester-linked PEGylated poly(disulfide)-based micelle-doxorubicin; T-S-NLC = TISWPPR-PEG-modified salinomycin loaded nanostructured lipid carriers; AI Egen<sup>®</sup> : a fluorogen with aggregation-induced emission characteristics; MGC-GNP/PTX : M2 and C7 peptides decorated glutathione-sensitive nanoparticle/paclitaxel; PDFDP : click-functional PEG grafted amphiphilic polymer to coat hydrophobic AIE-active polymer; CMP : Cell membrane-targeted peptide; QLPVM : glutamine-leucine-proline-valine-methionine peptide; Tf : transferrin; DIR/His-SA-BSP : DIR labelled histidine-stearic acid-Bletilla striata polysaccharides;; cRGD-PTN-DOX : cyclic arginine-glycine-aspartic acid-PEG-poly(L-tyrosine); FA-PLGA-Pba : folate-poly(lactic-co-glycolic acid)-pheophorbide.

<sup>a</sup>References

- S1. W. Ma, S. N. Sha, P. L. Chen, M. Yu, J. J. Chen, C. B. Huang, B. Yu, Y. Liu, L. H. Liu and Z. Q. Yu, *Adv. Healthc. Mater.*, 2019, **9**, e1901100.  
S2. G. Yan, Y. Huang, D. Li, Y. Xu, J. Wang, X. Wang and R. Tang, *Eur. J. Pharm. Biopharm.*, 2019, **145**, 54–64.  
S3. J. Zhou, M. Sun, S. Jin, L. Fan, W. Zhu, X. Sui, L. Cao, C. Yang and C. Han, *Drug Deliv.*, 2019, **26**, 281–289.  
S4. X. Cai, D. Mao, C. Wang, D. Kong, X. Cheng and B. Liu, *Angew. Chem. Int. Ed. Eng.*, 2018, **57**, 16396–16400.  
S5. T. Cui, X. Li, Y. Shu, X. Huang, Y. Wang and W. Zhang, *Int. J. Pharmaceut.*, 2018, **552**, 16–26.  
S6. Y. Wu, Z. Chen, P. Zhang, L. Zhou, T. Jiang, H. Chen, P. Gong, D. S. Dimitrov, L. Cai and Q. Zhao, *Chem. Comm.*, 2018, **54**, 7314–7317.  
S7. J. Q. Peng, S. Fumoto, T. Suga, H. Miyamoto, N. Kuroda, S. Kawakami and K. Nishida, *J. Control. Release*, 2019, **302**, 42–53.  
S8. S. Lakkadwala, B. dos Santos Rodrigues, C. Sun and J. Singh, *Nanomed-Nanotechnol.*, 2020, **23**, 102112.  
S9. C. Wang, J. Zhu, J. Ma, Y. Yang and X. Cui, *Int. J. Pharm.*, 2019, **567**, 118436.  
S10. X. Gu, Y. Wei, Q. Fan, H. Sun, R. Cheng, Z. Zhong and C. Deng, *J. Control. Release*, 2019, **301**, 110–118.  
S11. J. Son, S. M. Yang, G. Yi, Y. J. Roh, H. Park, J. M. Park, M.-G. Choi and H. Koo, *Biochem. Biophys. Res. Commun.*, 2018, **498**, 523–528.  
S12. Z. Tang, C. Luo, Y. Jun, M. Yao, M. Zhang, K. He, L. Jin, J. Ma, S. Chen, S. Sun, M. Tao, L. Ding, X. Sun, X. Chen, L. Zhang, Y. Gao and Q.-I. Wang, *ACS appl. Mater. Interfaces*, 2020, **12**, 7984–7994.
